# Supplementary material for: Detecting Pathogenic Phytophthora Species Using Volatile Organic Compounds
Source: MDPI journal article supplement (doi:10.3390/molecules29081749), 2024-04-12
Supplement: s1 [file s1]

## Supplemental Material for “Detecting pathogenic *Phytophthora* species using volatile organic compounds”

**Authors:** Patrick Sherwood<sup>1</sup>, Ida Nordström<sup>1</sup>, Stephen Woodward<sup>2</sup>, Björn Bohman<sup>3</sup>, and Michelle Cleary<sup>1</sup>

### Affiliations:

<sup>1</sup>Southern Swedish Forest Research Centre, Swedish University of Agricultural Sciences, Box 190, 234 22 Lomma, Sweden

<sup>2</sup>Department of Plant Protection Biology, Swedish University of Agricultural Sciences, Box 102, 234 22 Lomma, Sweden

<sup>3</sup>School of Biological Sciences, Department of Plant and Soil Science, University of Aberdeen, Cruickshank Building, St. Machar Drive, Aberdeen AB24 3UU, UK

Table S1. *Phytophthora* species used in the study.

| Species                | Isolate   | Genbank Accession |
|------------------------|-----------|-------------------|
| <i>P. cambivora</i>    | A02       | PP082873          |
| <i>P. cinnamomi</i>    | A04       | MT663321          |
| <i>P. citricola</i>    | A23       | MT663314          |
| <i>P. gonapodyides</i> | P27#100   | KX055998          |
| <i>P. multivora</i>    | A21       | PP082874          |
| <i>P. plurivora</i>    | A03       | MT663323          |
| <i>P. polonica</i>     | UKR_Ph_10 | MT420386.1        |
| <i>P. syringae</i>     | P26 L53   | PP082875          |

Table S2. Random forest output

Call:  
 randomForest(x = complete\_train[-59], y = complete\_train\$Species, ntree  
 = 500)

Type of random forest: classification

Number of trees: 500

No. of variables tried at each split: 7

OOB estimate of error rate: 6.82%

Confusion matrix:

|              | cambivora | cinnamomi | citricola | gonapodyides | multivora | plurivora |
|--------------|-----------|-----------|-----------|--------------|-----------|-----------|
| cambivora    | 5         | 0         | 0         | 0            | 0         | 0         |
| cinnamomi    | 0         | 7         | 0         | 0            | 0         | 0         |
| citricola    | 0         | 0         | 3         | 0            | 0         | 0         |
| gonapodyides | 0         | 0         | 0         | 7            | 0         | 0         |
| multivora    | 0         | 0         | 0         | 0            | 3         | 0         |
| plurivora    | 0         | 0         | 0         | 0            | 0         | 6         |
| polonica     | 0         | 0         | 0         | 0            | 0         | 0         |
| syringae     | 0         | 0         | 0         | 0            | 0         | 0         |

  

|              | polonica | syringae | class.error |
|--------------|----------|----------|-------------|
| cambivora    | 0        | 0        | 0.0         |
| cinnamomi    | 0        | 0        | 0.0         |
| citricola    | 0        | 2        | 0.4         |
| gonapodyides | 0        | 0        | 0.0         |
| multivora    | 0        | 0        | 0.0         |
| plurivora    | 0        | 0        | 0.0         |
| polonica     | 4        | 1        | 0.2         |
| syringae     | 0        | 6        | 0.0         |

y\_pred

|              | cambivora | cinnamomi | citricola | gonapodyides | multivora | plurivora |
|--------------|-----------|-----------|-----------|--------------|-----------|-----------|
| cambivora    | 3         | 0         | 0         | 0            | 0         | 0         |
| cinnamomi    | 0         | 1         | 0         | 0            | 0         | 0         |
| citricola    | 0         | 0         | 3         | 0            | 0         | 0         |
| gonapodyides | 0         | 0         | 0         | 1            | 0         | 0         |
| multivora    | 0         | 0         | 0         | 0            | 5         | 0         |
| plurivora    | 0         | 0         | 0         | 0            | 0         | 2         |
| polonica     | 0         | 0         | 0         | 0            | 0         | 0         |
| syringae     | 0         | 0         | 0         | 0            | 0         | 0         |

  

|              | polonica | syringae |
|--------------|----------|----------|
| cambivora    | 0        | 0        |
| cinnamomi    | 0        | 0        |
| citricola    | 0        | 0        |
| gonapodyides | 0        | 0        |
| multivora    | 0        | 0        |
| plurivora    | 0        | 0        |
| polonica     | 3        | 0        |
| syringae     | 0        | 2        |

Confusion Matrix and Statistics

|              | Reference |           |           |              |           |           |
|--------------|-----------|-----------|-----------|--------------|-----------|-----------|
| Prediction   | cambivora | cinnamomi | citricola | gonapodyides | multivora | plurivora |
| cambivora    | 3         | 0         | 0         | 0            | 0         | 0         |
| cinnamomi    | 0         | 1         | 0         | 0            | 0         | 0         |
| citricola    | 0         | 0         | 3         | 0            | 0         | 0         |
| gonapodyides | 0         | 0         | 0         | 1            | 0         | 0         |

|              |           |          |   |   |   |   |
|--------------|-----------|----------|---|---|---|---|
| multivora    | 0         | 0        | 0 | 0 | 5 | 0 |
| plurivora    | 0         | 0        | 0 | 0 | 0 | 2 |
| polonica     | 0         | 0        | 0 | 0 | 0 | 0 |
| syringae     | 0         | 0        | 0 | 0 | 0 | 0 |
| Prediction   | Reference |          |   |   |   |   |
|              | polonica  | syringae |   |   |   |   |
| cambivora    | 0         | 0        |   |   |   |   |
| cinnamomi    | 0         | 0        |   |   |   |   |
| citricola    | 0         | 0        |   |   |   |   |
| gonapodyides | 0         | 0        |   |   |   |   |
| multivora    | 0         | 0        |   |   |   |   |
| plurivora    | 0         | 0        |   |   |   |   |
| polonica     | 3         | 0        |   |   |   |   |
| syringae     | 0         | 2        |   |   |   |   |

#### Overall Statistics

Accuracy : 1  
95% CI : (0.8316, 1)  
No Information Rate : 0.25  
P-Value [Acc > NIR] : 9.095e-13

Kappa : 1

McNemar's Test P-Value : NA

#### Statistics by Class:

|                      |                     |                  |                  |
|----------------------|---------------------|------------------|------------------|
|                      | Class: cambivora    | Class: cinnamomi | Class: citricola |
| Sensitivity          | 1.00                | 1.00             | 1.00             |
| Specificity          | 1.00                | 1.00             | 1.00             |
| Pos Pred Value       | 1.00                | 1.00             | 1.00             |
| Neg Pred Value       | 1.00                | 1.00             | 1.00             |
| Prevalence           | 0.15                | 0.05             | 0.15             |
| Detection Rate       | 0.15                | 0.05             | 0.15             |
| Detection Prevalence | 0.15                | 0.05             | 0.15             |
| Balanced Accuracy    | 1.00                | 1.00             | 1.00             |
|                      | Class: gonapodyides | Class: multivora | Class: plurivora |
| Sensitivity          | 1.00                | 1.00             | 1.0              |
| Specificity          | 1.00                | 1.00             | 1.0              |
| Pos Pred Value       | 1.00                | 1.00             | 1.0              |
| Neg Pred Value       | 1.00                | 1.00             | 1.0              |
| Prevalence           | 0.05                | 0.25             | 0.1              |
| Detection Rate       | 0.05                | 0.25             | 0.1              |
| Detection Prevalence | 0.05                | 0.25             | 0.1              |
| Balanced Accuracy    | 1.00                | 1.00             | 1.0              |
|                      | Class: polonica     | Class: syringae  |                  |
| Sensitivity          | 1.00                | 1.0              |                  |
| Specificity          | 1.00                | 1.0              |                  |
| Pos Pred Value       | 1.00                | 1.0              |                  |
| Neg Pred Value       | 1.00                | 1.0              |                  |
| Prevalence           | 0.15                | 0.1              |                  |
| Detection Rate       | 0.15                | 0.1              |                  |
| Detection Prevalence | 0.15                | 0.1              |                  |
| Balanced Accuracy    | 1.00                | 1.0              |                  |

|          |                  |
|----------|------------------|
| Compound |                  |
| Number   | MeanDecreaseGini |
| 31       | 2.21601429       |
| 33       | 2.08287808       |
| 44       | 2.00814904       |
| 28       | 1.64924756       |
| 18       | 1.35843650       |

|    |            |
|----|------------|
| 37 | 1.34925174 |
| 32 | 1.22850601 |
| 23 | 1.21609388 |
| 6  | 1.19249060 |
| 54 | 1.19190446 |
| 55 | 1.19120649 |
| 27 | 1.14697671 |
| 34 | 1.13825623 |
| 15 | 1.13415435 |
| 2  | 1.11860148 |
| 41 | 1.11393595 |
| 26 | 1.04633624 |
| 11 | 0.89502606 |
| 42 | 0.74019379 |
| 36 | 0.71852546 |
| 29 | 0.70871442 |
| 30 | 0.66924751 |
| 5  | 0.57513530 |
| 46 | 0.55359017 |
| 8  | 0.53217223 |
| 50 | 0.48836867 |
| 52 | 0.45715472 |
| 1  | 0.39709090 |
| 39 | 0.38468962 |
| 3  | 0.32260217 |
| 20 | 0.30363248 |
| 47 | 0.24822879 |
| 12 | 0.24086448 |
| 57 | 0.23562026 |
| 7  | 0.23367772 |
| 17 | 0.22658870 |
| 38 | 0.22108477 |
| 51 | 0.20001909 |
| 22 | 0.18427660 |
| 14 | 0.18345722 |
| 45 | 0.16987478 |
| 40 | 0.16830214 |
| 21 | 0.14493169 |
| 58 | 0.13438665 |
| 4  | 0.12300568 |
| 16 | 0.05468539 |
| 24 | 0.04792784 |
| 48 | 0.03992667 |
| 49 | 0.03786164 |
| 9  | 0.03621675 |
| 43 | 0.03426730 |
| 19 | 0.03391870 |
| 56 | 0.03299841 |
| 53 | 0.02790879 |
| 10 | 0.02785695 |
| 13 | 0.02250193 |
| 35 | 0.01694943 |
| 25 | 0.00000000 |

---

Compound numbers correspond to the peak number column in Table 1 of the main text.

R outputs of ANOVA tables and Dunnett's test for lesion lengths by tree species. Note that Inocul = inoculation type, which has 3 levels (1) MIC, (2) cinnamomi and (3) plurivora.

Table S3 R outputs of ANOVA tables and Dunnett's test for lesion lengths in pedunculate oak trees

```
> #oak
> model_oak <- aov(Lesion ~ Inocul, data = data_oak)
summary(model_oak)
```

|           | Df | Sum Sq | Mean Sq | F value | Pr(>F)      |
|-----------|----|--------|---------|---------|-------------|
| Inocul    | 2  | 601.1  | 300.53  | 79.55   | 4.8e-05 *** |
| Residuals | 6  | 22.7   | 3.78    |         |             |

```
---
Signif. codes:  0 '***' 0.001 '**' 0.01 '*' 0.05 '.' 0.1 ' ' 1

> DunnettTest(x=data_oak$Lesion, g=data_oak$Inocul)

Dunnett's test for comparing several treatments with a control :
95% family-wise confidence level

$aMIC
```

|               | diff     | lwr.ci    | upr.ci   | pval        |
|---------------|----------|-----------|----------|-------------|
| cinnamomi-MIC | 13.66667 | 9.118414  | 18.21492 | 0.00024 *** |
| plurivora-MIC | 19.50000 | 14.951747 | 24.04825 | 3.2e-05 *** |

```
---
Signif. codes:  0 '***' 0.001 '**' 0.01 '*' 0.05 '.' 0.1 ' ' 1
```

Table S4 R outputs of ANOVA tables and Dunnett's test for lesion lengths in European beech trees

```
> #beech
> model_beech <- aov(Lesion ~ Inocul, data = data_oak)
> summary(model_beech)
```

|           | Df | Sum Sq | Mean Sq | F value | Pr(>F)      |
|-----------|----|--------|---------|---------|-------------|
| Inocul    | 2  | 601.1  | 300.53  | 79.55   | 4.8e-05 *** |
| Residuals | 6  | 22.7   | 3.78    |         |             |

```
---
Signif. codes:  0 '***' 0.001 '**' 0.01 '*' 0.05 '.' 0.1 ' ' 1
> DunnettTest(x=data_beech$Lesion, g=data_beech$Inocul)
```

Dunnett's test for comparing several treatments with a control :  
95% family-wise confidence level

```
$aMIC
```

|               | diff     | lwr.ci    | upr.ci   | pval      |
|---------------|----------|-----------|----------|-----------|
| cinnamomi-MIC | 33.70000 | 18.459461 | 48.94054 | 0.0013 ** |
| plurivora-MIC | 24.36667 | 9.126128  | 39.60721 | 0.0067 ** |

```
---
Signif. codes:  0 '***' 0.001 '**' 0.01 '*' 0.05 '.' 0.1 ' ' 1
```

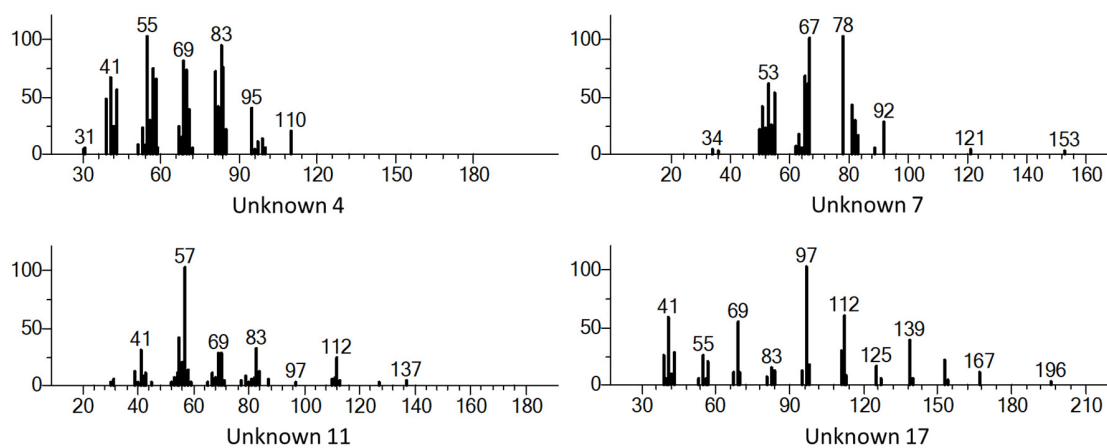

Figure S1. Mass spectra of important unidentified compounds 4, 7, 11, and 17 in Table 2 from the *in vitro* study.

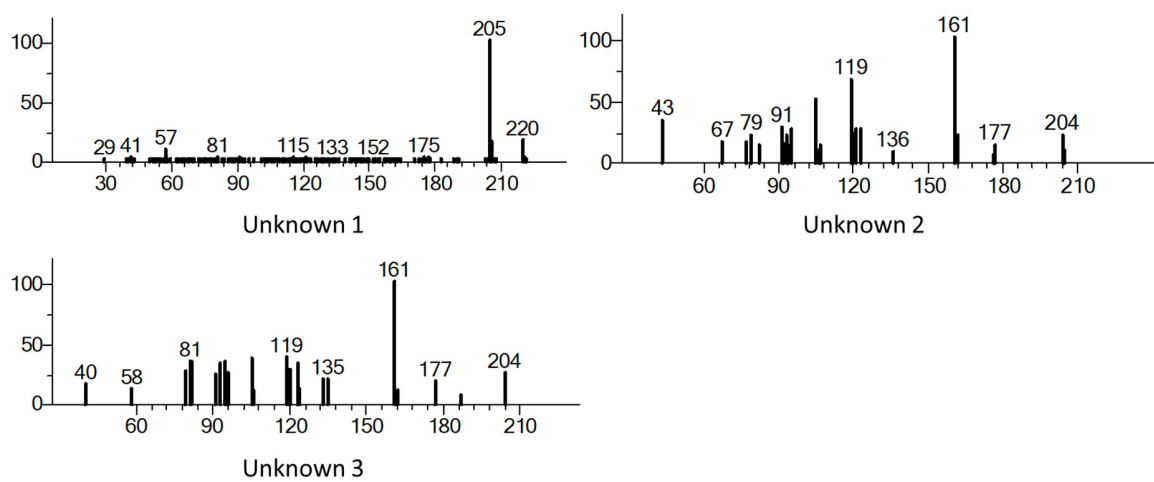

Figure S2. Mass spectra of unidentified compounds 1-3 in Table 3 from the *in vivo* study
